# Supplementary material for: deCS: A Tool for Systematic Cell Type Annotations of Single-cell RNA Sequencing Data among Human Tissues
Source: bioRxiv preprint, doi:10.1101/2021.09.19.460993, version 2 (2022-02-14)

Association between trait-associated genes and cell type-specific genes

Cell type in human cell landscape

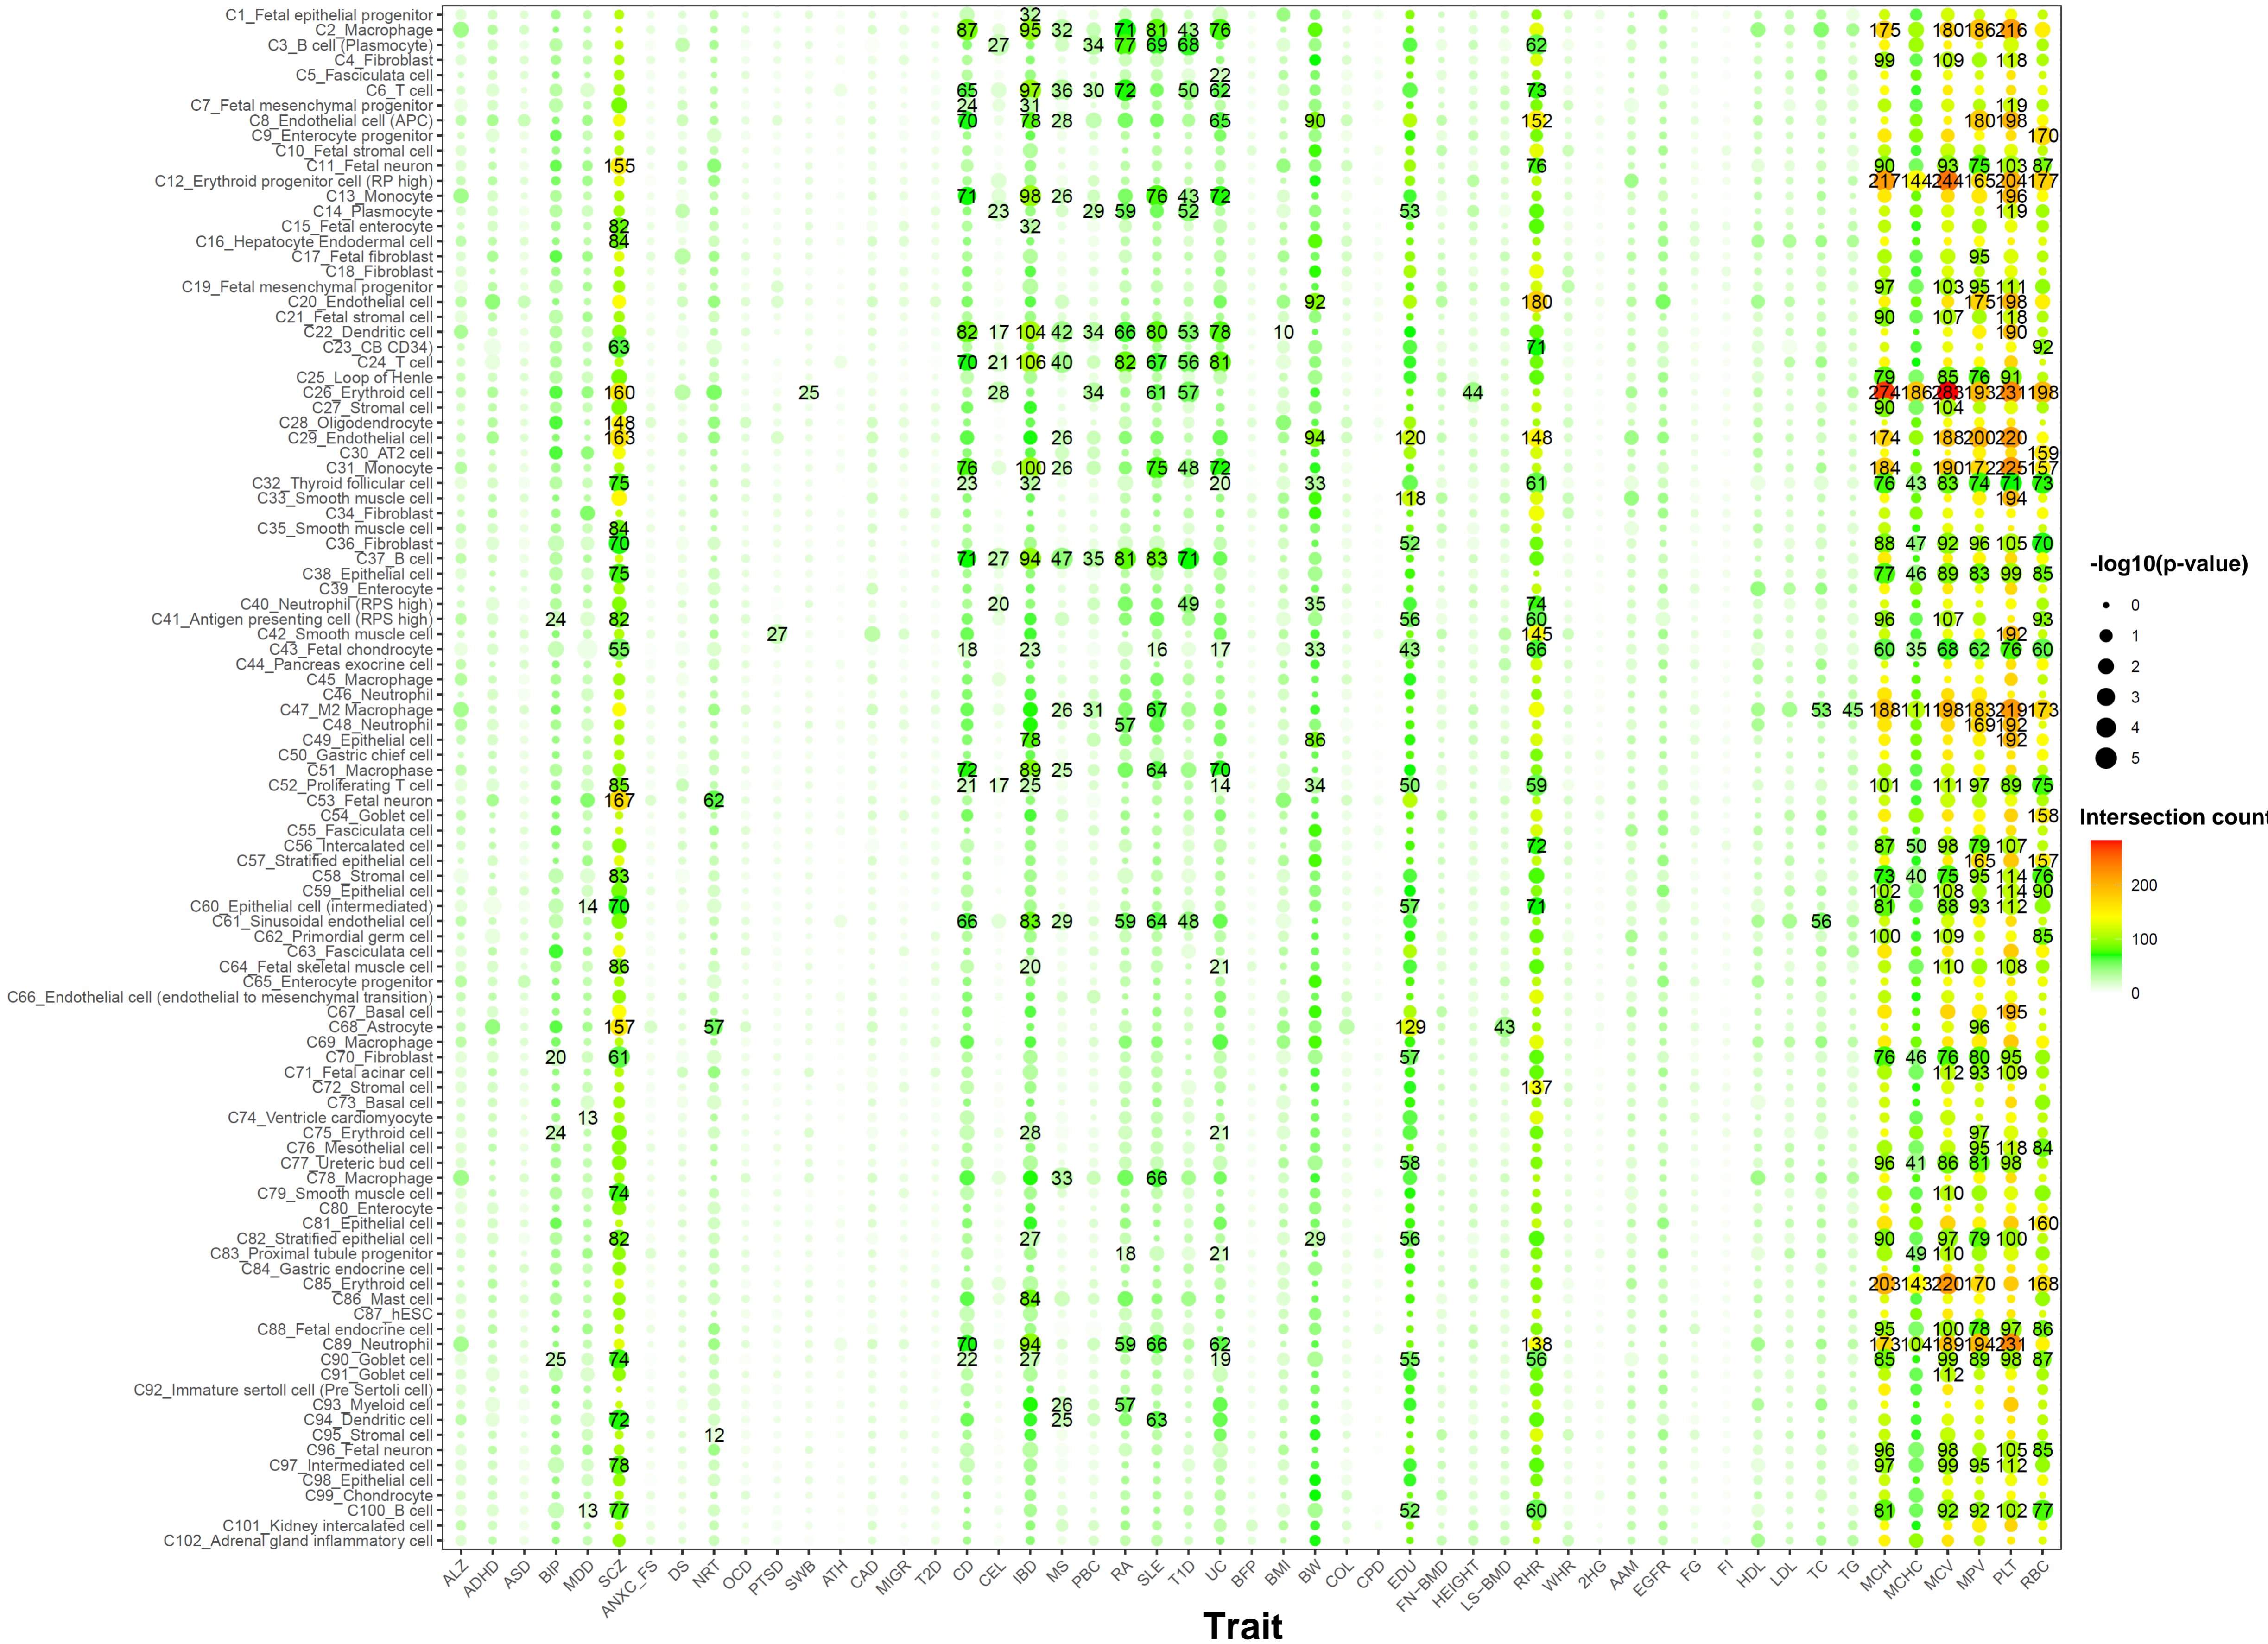

Supplement: Figure S11 [file 460993_file20.pdf]
